# Supplementary material for: Ursolic-Acid-Enriched Herba Cynomorii Extract Protects against Oxidant Injury in H9c2 Cells and Rat Myocardium by Increasing Mitochondrial ATP Generation Capacity and Enhancing Cellular Glutathione Redox Cycling, Possibly through Mitochondrial Uncoupling
Source: Hindawi journal article supplement (doi:10.1155/2013/924128), 2013-01-01
Supplement: f1 [file 924128.f1.pdf]

**Herba Cynomorii (14 kg)**

↓ **Extracted with 95%  
Ethanol( $v/v$  in  $H_2O$ )**

**Ethanol extract (1.82 kg)**

↓ **Silica gel column chromatography**

|                             |                             |                             |                               |
|-----------------------------|-----------------------------|-----------------------------|-------------------------------|
| ↓ <b>Acetone : PE (3:7)</b> | ↓ <b>Acetone : PE (1:1)</b> | ↓ <b>Acetone : PE (7:3)</b> | ↓ <b>Absolute<br/>Ethanol</b> |
| <b>A1</b>                   | <b>A2</b>                   | <b>A3</b>                   | <b>A4</b>                     |

↓ **Silica gel column, eluted with  
Acetone : PE ( 3:7)**

|                  |                   |                  |
|------------------|-------------------|------------------|
| ↓                | ↓                 | ↓                |
| <b>HCY1(57g)</b> | <b>HCY2(140g)</b> | <b>HCY2(16g)</b> |
